# Supplementary material
Source: publisher site journal article supplement (https://www.dovepress.com/article/193808)
Supplement: Supplementary file 1 [file get_supplementary_file.php]

| **Variable** | **Num. Patients**  **（n = 288）** | **Variable** | **Num. Patients**  **（n = 288）** |
| --- | --- | --- | --- |
| **Age** |  | **Pathologic_N** |  |
| ＞60 | 152 | N0 | 50 |
| ≤60 | 134 | N1 | 23 |
| NA | 2 | N2 | 4 |
| **Gender** |  | NX | 211 |
| Female | 77 | **Pathologic_M** |  |
| Male | 211 | M0 | 95 |
| **Additional Therapy** |  | M1 | 9 |
| YES | 24 | MX | 184 |
| NO | 264 | **Pathologic_stage** |  |
| **Pathologic_T** |  | Stage I | 171 |
| T1 | 192 | Stage II | 21 |
| T2 | 33 | Stage III | 51 |
| T3 | 59 | Stage IV | 15 |
| T4 | 2 | Stage X | 30 |
| Tx | 2 |  |  |

Table S1: Summary of clinical features of patients
