# Supplementary material
Source: publisher site journal article supplement (https://www.dovepress.com/article/193808)
Supplement: Supplementary file 2 [file get_supplementary_file.php]

| variable                      | HR     | lower 95.CI | upper 95.CI | pvalue |
|-------------------------------|--------|-------------|-------------|--------|
| <b>2 subtype</b>              |        |             |             |        |
| age                           | 1.013  | 0.733       | 1.399       | 0.939  |
| gender(male vs female)        | 1.015  | 0.487       | 2.114       | 0.968  |
| subtype(S1 vs S2)             | 1.532  | 0.771       | 3.045       | 0.223  |
| stage(III-IV vs I-II)         | 3.084  | 1.453       | 6.542       | 0.003  |
| additional_therapy(YES vs NO) | 6.755  | 3.231       | 14.126      | <0.001 |
| <b>3 subtype</b>              |        |             |             |        |
| age                           | 1.206  | 0.85        | 1.712       | 0.294  |
| gender(male vs female)        | 0.895  | 0.429       | 1.866       | 0.767  |
| subtype(S1 vs S2)             | 9.469  | 2.134       | 42.006      | 0.003  |
| subtype(S3 vs S2)             | 11.248 | 2.44        | 51.851      | 0.002  |
| stage(III-IV vs I-II)         | 4.104  | 1.841       | 9.151       | 0.001  |
| additional_therapy(YES vs NO) | 5.271  | 2.547       | 10.91       | <0.001 |
| <b>4 subtype</b>              |        |             |             |        |
| age                           | 1.106  | 0.788       | 1.552       | 0.561  |
| gender(male vs female)        | 1.04   | 0.496       | 2.177       | 0.918  |
| subtype(S1 vs S2)             | 3.065  | 1.096       | 8.57        | 0.033  |
| subtype(S3 vs S2)             | 2.989  | 1.022       | 8.744       | 0.046  |
| subtype(S4 vs S2)             | 1.004  | 0.186       | 5.41        | 0.996  |
| stage(III-IV vs I-II)         | 3.321  | 1.456       | 7.572       | 0.004  |
| additional_therapy(YES vs NO) | 6.261  | 2.903       | 13.505      | <0.001 |
| <b>5 subtype</b>              |        |             |             |        |
| age                           | 1.087  | 0.771       | 1.532       | 0.635  |
| gender(male vs female)        | 1.09   | 0.513       | 2.317       | 0.823  |
| subtype(S1 vs S2)             | 2.876  | 1.015       | 8.147       | 0.047  |
| subtype(S3 vs S2)             | 3.007  | 1.028       | 8.797       | 0.044  |
| subtype(S4 vs S2)             | 0.946  | 0.175       | 5.107       | 0.949  |
| subtype(S5 vs S2)             | 7.995  | 0.814       | 78.481      | 0.074  |
| stage(III-IV vs I-II)         | 3.7    | 1.574       | 8.697       | 0.003  |
| additional_therapy(YES vs NO) | 5.952  | 2.746       | 12.903      | <0.001 |
| <b>6 subtype</b>              |        |             |             |        |
| age                           | 0.984  | 0.701       | 1.38        | 0.924  |
| gender(male vs female)        | 1.18   | 0.534       | 2.609       | 0.682  |
| subtype(S1 vs S2)             | 2.275  | 0.763       | 6.786       | 0.14   |
| subtype(S3 vs S2)             | 1.682  | 0.548       | 5.167       | 0.364  |
| subtype(S4 vs S2)             | 1.955  | 0.431       | 8.86        | 0.385  |
| subtype(S5 vs S2)             | 0.755  | 0.14        | 4.072       | 0.744  |
| subtype(S6 vs S2)             | 15.621 | 3.204       | 76.167      | 0.001  |
| stage(III-IV vs I-II)         | 3.534  | 1.49        | 8.381       | 0.004  |
| additional_therapy(YES vs NO) | 5.279  | 2.406       | 11.583      | <0.001 |
| <b>7 subtype</b>              |        |             |             |        |
| age                           | 1.013  | 0.727       | 1.413       | 0.938  |
| gender(male vs female)        | 1.094  | 0.491       | 2.434       | 0.827  |
| subtype(S1 vs S2)             | 0.627  | 0.208       | 1.886       | 0.406  |
| subtype(S3 vs S2)             | 1.083  | 0.285       | 4.121       | 0.907  |
| subtype(S4 vs S2)             | 0.604  | 0.128       | 2.864       | 0.526  |
| subtype(S5 vs S2)             | 1.437  | 0.602       | 3.433       | 0.414  |
| subtype(S6 vs S2)             | 0      | 0           | Inf         | 0.997  |
| subtype(S7 vs S2)             | 3.612  | 0.412       | 31.658      | 0.246  |
| stage(III-IV vs I-II)         | 3.215  | 1.315       | 7.859       | 0.01   |
| additional_therapy(YES vs NO) | 5.591  | 2.55        | 12.26       | <0.001 |

0.0880.3541.410  
HR (95% CI)
